# Supplementary material
Source: PubMed Central journal article supplement (PMC4643625)

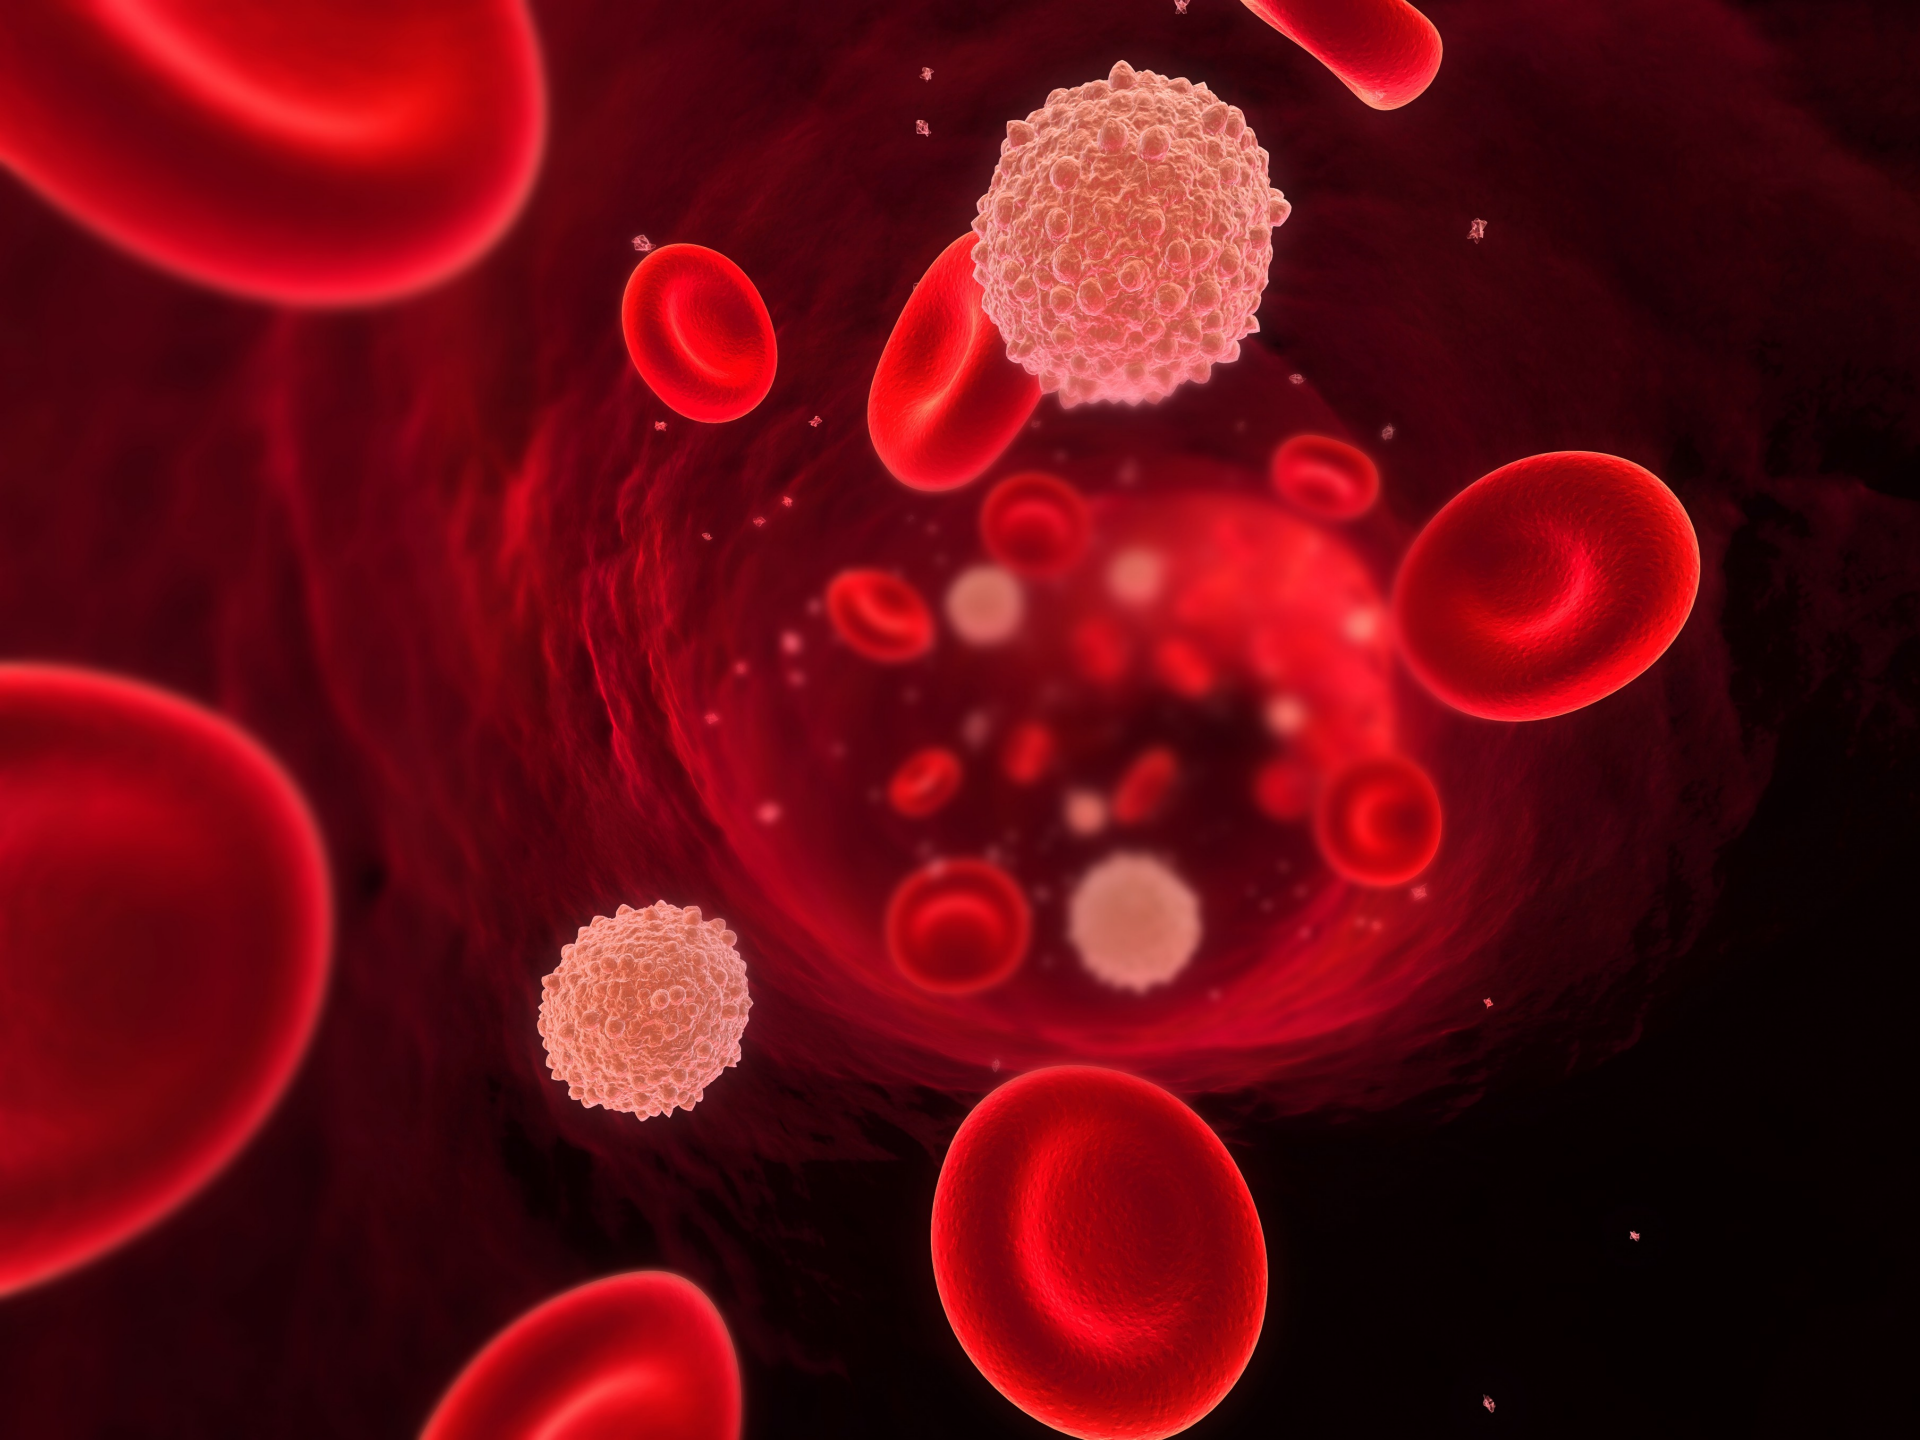

Supplement: brain-2014-02034-File008.pdf [file brain-2014-02034-File008.pdf]
